1           **Effectiveness and durability of protection against future SARS-CoV-2 infection**  
2           **conferred by COVID-19 vaccination and previous infection; findings from the UK**  
3           **SIREN prospective cohort study of healthcare workers March 2020 to September 2021**

4  
5           **Authors**

6           Victoria Hall<sup>1,2\*</sup> FFPH, Sarah Foulkes<sup>1\*</sup> MSc, Ferdinando Insalata<sup>1\*</sup> MSc, Ayoub Saei<sup>1</sup> PhD,  
7           Peter Kirwan<sup>1,3</sup> BSc, Ana Atti<sup>1</sup> MSc, Edgar Wellington<sup>1</sup> MSc, Jameel Khawam<sup>1</sup> MSc, Katie  
8           Munro<sup>1</sup> MSc, Michelle Cole<sup>1</sup> DBMS, Caio Tranquillini<sup>1</sup> MD, Andrew Taylor-Kerr<sup>1</sup> MSc,  
9           Nipunadi Hettiarachchi<sup>1</sup> BSc, Davina Calbraith<sup>1</sup> PhD, Noshin Sajedi<sup>1</sup> MSc, Iain Milligan<sup>1</sup>  
10          MRCP, Yrene Themistocleous<sup>1</sup> MBChB, Diane Corrigan<sup>4</sup> FFPH, Lisa Crome<sup>4</sup> MFPH,  
11          Lesley Price<sup>5,6</sup> PhD, Sally Stewart<sup>5,6</sup> MSc, Elen de Lacy<sup>7</sup> MSc, Chris Norman<sup>8</sup> MSc, Ezra  
12          Linley<sup>1</sup> PhD, Ashley David Otter<sup>1</sup> PhD, Amanda Semper<sup>1</sup> DPhil, Jacqueline Hewson<sup>1</sup> PhD,  
13          Silvia D’Arcangelo<sup>1</sup> PhD, the SIREN Study Group<sup>-</sup>, Meera Chand<sup>1,9</sup> FRCPATH, Colin S  
14          Brown<sup>1,2</sup> FRCPATH, Tim Brooks<sup>1</sup> FRCPATH, Jasmin Islam<sup>1</sup> PhD, Andre Charlett<sup>1,10,11</sup> PhD,  
15          Susan Hopkins<sup>1,2</sup> FRCP.

16          \*authors contributed equally

17          □ SIREN study group names provided in supplementary material

18          **Author Affiliations:**

- 19           1. UK Health Security Agency  
20           2. The National Institute for Health Research Health Protection Research (NIHR) Unit in  
21           Healthcare Associated Infections and Antimicrobial Resistance at the University of  
22           Oxford  
23           3. Medical Research Council Biostatistics Unit, University of Cambridge  
24           4. Public Health Agency Northern Ireland  
25           5. Glasgow Caledonian University

- 26 6. Public Health Scotland
- 27 7. Public Health Wales
- 28 8. Health and Care Research Wales
- 29 9. Guys and Thomas's NHS Trust
- 30 10. NIHR Health Protection Research Unit in Behavioural Science and Evaluation at
- 31 University of Bristol in partnership with Public Health England
- 32 11. NIHR Health Protection Research Unit in Immunisation at the London School of
- 33 Hygiene and Tropical Medicine in partnership with Public Health England

34

35 **Corresponding author:**

36 Susan Hopkins, Chief Investigator [susan.hopkins@phe.gov.uk](mailto:susan.hopkins@phe.gov.uk)

37

38 **ABSTRACT**

39 Background:

40 Understanding the duration and effectiveness of infection and vaccine-acquired SARS-CoV-  
41 2 immunity is essential to inform pandemic policy interventions, including the timing of  
42 vaccine-boosters. We investigated this in our large prospective cohort of UK healthcare  
43 workers undergoing routine asymptomatic PCR testing.

44 Methods

45 We assessed vaccine effectiveness (VE) (up to 10-months after first dose) and infection-  
46 acquired immunity by comparing time to PCR-confirmed infection in vaccinated and  
47 unvaccinated individuals using a Cox regression-model, adjusted by prior SARS-CoV-2  
48 infection status, vaccine-manufacturer/dosing-interval, demographics and workplace  
49 exposures.

50 Results

51 Of 35,768 participants, 27% (n=9,488) had a prior SARS-CoV-2 infection. Vaccine coverage  
52 was high: 97% had two-doses (79% BNT162b2 long-interval, 8% BNT162b2 short-interval,  
53 8% ChAdOx1). There were 2,747 primary infections and 210 reinfections between  
54 07/12/2020 and 21/09/2021. Adjusted VE (aVE) decreased from 81% (95% CI 68%-89%)  
55 14-73 days after dose-2 to 46% (95% CI 22%-63%) >6-months; with no significant difference  
56 for short-interval BNT162b2 but significantly lower aVE (50% (95% CI 18%-70%) 14-73 days  
57 after dose-2 from ChAdOx1. Protection from infection-acquired immunity showed evidence  
58 of waning in unvaccinated follow-up but remained consistently over 90% in those who  
59 received two doses of vaccine, even in those infected over 15-months ago.

60 Conclusion

61 Two doses of BNT162b2 vaccination induce high short-term protection to SARS-CoV-2  
62 infection, which wanes significantly after six months. Infection-acquired immunity boosted

63 with vaccination remains high over a year after infection. Boosters will be essential to  
64 maintain protection in vaccinees who have not had primary infection to reduce infection and  
65 transmission in this population.

66 Trial registration number

67 ISRCTN11041050

68

## 69 BACKGROUND

70 Understanding the durability of the immune response to SARS-CoV-2 infection and COVID-  
71 19 vaccination remains critical to the global COVID-19 response. Twenty months after  
72 emergence, SARS-CoV-2 has caused millions of deaths,<sup>1</sup> and widespread disruption to  
73 global health and economies. The development and mass deployment of COVID-19  
74 vaccines within a year was unprecedented and has facilitated relaxation of non-  
75 pharmaceutical interventions. COVID-19 vaccines have demonstrated short-term  
76 effectiveness in real-world studies, reducing both symptomatic and asymptomatic infection,  
77 severity and secondary transmission.<sup>2-5</sup> The duration of this protection over longer periods  
78 remains uncertain and requires ongoing study.

79 Population uptake of COVID-19 vaccination in the UK (aged over 12 years) is 80.4% for two  
80 doses,<sup>6</sup> and prioritised groups (health and social care workers and the clinically vulnerable),  
81 are now over six months after their second dose. Following concerns about potential vaccine  
82 waning at this point,<sup>7-11</sup> and in the context of sustained high levels of community infections,<sup>6</sup>  
83 the UK Government initiated a roll-out of booster vaccination to priority groups in September  
84 2021.<sup>12</sup> Improved understanding and characterisation of vaccine effectiveness at longer  
85 intervals and potential variation by demographic factors, vaccine schedules and history of  
86 SARS-CoV-2 infection is urgently required to support global vaccination schedules.

87 The SARS-CoV-2 Immunity and Reinfection Evaluation (SIREN) study, a large cohort of  
88 healthcare workers undergoing fortnightly asymptomatic PCR testing, had over 30% of  
89 participants testing seropositive at enrolment and is well suited to this task.<sup>5,13,14</sup> In this  
90 analysis we estimate the effectiveness and durability of protection against future SARS-CoV-  
91 2 infection conferred by previous SARS-CoV-2 infection and COVID-19 vaccination in the  
92 SIREN cohort from March 2020 to September 2021.

93

## 94 METHODS

95 **Study design and participants**

96 The SIREN study is a multicentre prospective cohort of healthcare workers aged over 18  
97 years across the UK.

98 **Data sources and measurement**

99 Participants undergo fortnightly SARS-CoV-2 PCR testing (supplemented by widespread  
100 lateral flow testing), monthly antibody testing and complete regular questionnaires. This  
101 data collection is described elsewhere.<sup>5</sup>

102 Vaccination data (manufacturer, dates) were obtained via linkage on personal identifiers  
103 from national COVID-19 registries in each health administration and directly from  
104 participants in their questionnaires. Dosing interval was categorised as 'short' if dose-two  
105 was administered up to 6-weeks post dose-one and 'long' if  $\geq 6$ -weeks.<sup>15</sup>

106 Serum samples from all participant baseline visits are collected centrally and tested at the  
107 United Kingdom Health Security Agency (UKHSA) central testing laboratory at Porton Down  
108 using the semi-quantitative Elecsys Anti-SARS-CoV-2 nucleocapsid (N) protein assay and  
109 fully quantitative Elecsys Anti-SARS-CoV-2 spike (S) protein assay (Roche Diagnostics).

110 **Outcomes**

111 The primary outcome was a PCR-confirmed SARS-CoV-2 infection, irrespective of symptom  
112 status, that met the definition of a reinfection in the positive cohort of two PCR positives  $\geq 90$   
113 days or one new PCR positive  $\geq 28$  days after an antibody positive result consistent with  
114 previous infection.

115 **Explanatory variables and exclusion criteria**

116 Participants were assigned into one of two cohorts at the start of analysis time: participants  
117 in the naïve cohort had no history of SARS-CoV-2 positivity and the positive cohort being  
118 those who had ever received a PCR positive or antibody result consistent with prior SARS-  
119 CoV-2 infection.

120 Participants were excluded from this analysis if event or cohort assignment could not be  
121 accurately completed, i.e. no PCR tests during follow-up, or if they were in the positive  
122 cohort but were infected after vaccination or lacked an onset date for primary infection (PCR  
123 positive or COVID-symptom onset).

#### 124 **Person time at risk**

125 Follow-up began on 07 December 2020, the day before COVID-19 vaccination was  
126 introduced to the UK, and continued until 21 September 2021, covering 10 calendar months.  
127 All participants enrolled on or before 07 December 2020 contributed follow-up time from 07  
128 December 2020 onwards. Participants enrolled after 07 December 2020 began contributing  
129 follow-up time from their enrolment date (delayed entry). Participants moved from the  
130 negative to positive cohort 90 days after a primary PCR positive date, if their primary  
131 infection was before vaccination, at which point they were considered at risk of reinfection  
132 (mirroring the SIREN reinfection definition: two PCR positives >90-days apart). End of  
133 follow-up time for individual participants was either date of primary infection (negative  
134 cohort), date of reinfection (positive cohort) or last PCR negative test.

#### 135 **Statistical methods**

136 We used a Cox proportional hazards model with delayed entry, the outcome being time-to-  
137 infection with a positive PCR test. The model accounted for the calendar time, varying  
138 infection rate via the baseline hazard, that could take any functional form. Analysis time  
139 started shortly before the second wave peaked, continuing through Spring 2021 and into the  
140 third wave (Supplementary Figure iii), thus, accounting for a varying hazard rate was crucial.

141 The main predictors – vaccine status and previous infection status - were categorical and  
142 time-varying. We grouped on the time to vaccination and divided follow-up time into  
143 unvaccinated and 24 post-vaccination time intervals, with post-vaccination intervals  
144 categorised by manufacturer, dose and dosing interval, the latter to explore differences in  
145 protection in those receiving dose two closer in time to their first dose. We also grouped the

146 time since primary infection into four time-intervals: before primary infection (naïve), and  
147 then 3-9 months, 9-15 months and  $\geq 15$  months after primary infection. Vaccine effectiveness  
148 and protection from primary infection were calculated as 1-HR. We used robust variance  
149 estimates to guard against the potential for unmeasured confounders at trust level.

150 We initially fitted a main effects model, with no interactions between vaccine and primary  
151 infection status. This was our main model that highlighted vaccine effectiveness over time.  
152 We also fitted an interaction model, in which we did not consider time since vaccination,  
153 brand and manufacturer, to focus on protection from primary infection over time by vaccine  
154 status. We fitted both models with and without additional time invariant covariates: age,  
155 ethnicity, co-morbidities, region, frequency of COVID-19 patient contact, patient-facing role,  
156 and workplace setting. Independently, we also fitted an equivalent piecewise exponential  
157 proportional hazards model. This produced consistent VE results and provided estimates of  
158 the baseline hazard rates (supplementary material; Figure iii), analogous to the method we  
159 have previously described.<sup>5</sup> We used STATA software (version 15.1; StataCorp LLC,  
160 College Station, TX, USA) for all analyses. Results were independently replicated in R (v.  
161 4.1.1, survival package v.3.2-13). Our annotated code is available  
162 (<https://github.com/SIREN-study/SARS-CoV-2-Immunity>).

163 This study was registered, number ISRCTN11041050, and received approval from the  
164 Berkshire Research Ethics Committee on 22 May 2020. Reporting of the study follows the  
165 Strengthening the Reporting of Observational studies in Epidemiology guidelines.<sup>16</sup>

166

## 167 **RESULTS**

### 168 **Study population**

169 The SIREN study enrolled 44,546 participants between 18 June 2020 and 23 April 2021  
170 from 135 sites across the UK; n=35,768 met the inclusion criteria for this analysis  
171 (Supplementary Figure i). Participants are described in Table 1, and were predominantly



172 female (84%), with a median age of 46 years (IQR 36-54). We assigned 26,280 participants  
173 to the naïve cohort and 9,488 to the positive cohort at analysis start time. The positive  
174 cohort were more likely to be male, younger, from Black, Asian and ethnic minority  
175 backgrounds, work in clinical roles and report more frequent exposure to COVID-19 patients  
176 (Table 1). By the end of analysis time, 97% of the cohort had received two vaccine doses:  
177 78.5% BNT162b2 long-interval, 8.6% BNT162b2 short-interval and 7.8% ChAdOX1 (Table  
178 1, Supplementary Figure ii). We identified no major demographic differences between  
179 participants by vaccine schedule (Supplementary Table i). Follow-up time varied by  
180 participant, with a total of 7,482,388 participant person-days, of which there were 998,270  
181 person-days unvaccinated, and 6,430,118 person-days vaccinated (from date of first dose).  
182 There were 60,301 PCR tests performed in the unvaccinated follow-up period and 443,979  
183 PCR tests in the vaccinated follow-up period, with an average test interval of 16.6 days per  
184 test in the unvaccinated period and 14.5 days per test in the vaccinated period. There were  
185 2,747 primary infections during follow-up and 210 reinfections, with cases peaking at the end  
186 of December 2020 and declining by March-April 2021, before increasing in May 2021, which  
187 mirrored national trends (Supplementary Figure iii).

## 188 **Vaccine effectiveness**

189 The overall adjusted vaccine effectiveness (aVE) against infection following dose-two of  
190 BNT162b2 vaccine administered after the long-interval was 81% (95% CI 68%-89%) in the  
191 first two months after the development of the full immune response (14-73 days after second  
192 dose) (Table 2, Figure 1). aVE declined over time, although remained high at 70% (95% CI  
193 62%-76%) 4-6 months after dose-two. After six months we saw evidence of waning, with  
194 aVE of 46% (95% CI 22%-63%).

195 A similar trend was observed for BNT162b2 dose two short-interval, with higher protection at  
196 14-73 days (aVE 86% (95% CI 73%-93%)) decreasing to 61% (95% CI 45%-73%) after 6-  
197 months. We found no significant difference in protection after dose-two between BNT162b2

198 long and short inter-vaccination intervals, with HR for infection of 1.39 (95% CI 0.64-3.00,  
199  $p=0.41$ ) using short interval as the reference group.

200 For ChAdOX1, aVE from two doses was 50% (95% CI 16%-69%) 14-73 days after second  
201 dose. Effectiveness did not fall significantly after longer intervals after dose-two, with  
202 overlapping confidence intervals of VE reflecting the small number of participants  
203 contributing to this estimate (Table 2, Figure 1). Compared to ChAdOX1, we found that  
204 Pfizer short was 72% more effective (95% CI 38%-88%,  $p=0.002$ ) and Pfizer long was 62%  
205 more effective (95% CI 26%-80%,  $p=0.004$ ), in the interval 14-73 days.

### 206 **Durability of protection following primary infection**

207 In contrast, looking at the impact of vaccination on the cohort with prior COVID-19 infection  
208 (positive cohort), using naïve unvaccinated as the reference group (Table 3, Figure 2), a  
209 beneficial boosting of infection-acquired immunity was apparent, with combined protection  
210 over 90% a year or more after primary infection and two doses of vaccination. There was no  
211 evidence of the protection afforded by primary infection waning in participants who had  
212 received two doses of vaccine up to 15 months after the primary infection. A similar trend  
213 was observed after a single dose and even without vaccination, however, most unvaccinated  
214 follow-up time occurred pre-Delta.

### 215 **DISCUSSION**

216 Eighteen months after the emergence of SARS-CoV-2 and ten months after the rapid  
217 deployment of COVID-19 vaccines, we have assessed the durability of protection from  
218 SARS-CoV-2 infection conferred by both infection-acquired and vaccine-acquired immunity.  
219 Our cohort of 35,768 healthcare workers, including over a quarter with prior infection,  
220 primarily received two doses of BNT162b2 administered at a long inter-vaccine interval,  
221 which induced high levels of protection over the first 6 months, peaking between 68% and  
222 89% in the first two months; however, we found evidence of significant waning, with  
223 protection reducing to between 22% and 63% after six months. We found no difference in

224 protection following two doses when comparing BNT162b2 short interval with BNT162b2  
225 long interval, although we found significantly lower protection from two doses of ChAdOX1  
226 compared to BNT12b2. Of note, the period of waning coincided with the Delta variant being  
227 the predominant circulating strain, which may account for the more pronounced waning of  
228 protection in our cohort, given the reduced vaccine effectiveness against Delta reported.<sup>17</sup>  
229 Delivery of vaccination to individuals after prior infection effectively boosts and extends their  
230 immunity, with participants who received two doses of vaccination after infection emerging  
231 as the most highly protected group in our cohort for both symptomatic and asymptomatic  
232 infection, with similar protection to that provided by a three-course vaccination against  
233 symptomatic infection.<sup>18</sup>

234 Our finding of reduced protection from infection following two doses of vaccination after six  
235 months strengthens the accruing evidence base. Our design overcomes several biases of  
236 recent studies, including underestimation of the proportion with prior infection;<sup>19</sup> previous  
237 studies have typically investigated symptomatic infection and utilised test-negative case-  
238 control or retrospective cohort designs using national testing surveillance data.<sup>7,9,11</sup> We note  
239 that these real-world studies have found consistently lower protection and more pronounced  
240 waning than the recent BNT162b2 clinical trial, which reported vaccine efficacy against  
241 symptomatic infection of 83.7% (95% CI, 74.7 to 89.9) 4-6 months after dose-2,<sup>20</sup> likely  
242 related to the reduced vaccine effectiveness reported against the Delta variant.<sup>17</sup> The  
243 significantly lower protection observed in this study after ChAdOX1 compared to BNT162b2  
244 has also been found in other recent studies.<sup>7,20</sup> Several studies have observed lower  
245 antibody titres following ChAdOx1 vaccination than BNT162b2,<sup>21,22</sup> and a shorter interval to  
246 fall below a protective antibody threshold from this lower baseline has been proposed as a  
247 causal mechanism for the lower vaccine effectiveness.<sup>20</sup> We found no evidence of a  
248 difference in protection against infection after two doses of BNT162b2 between short and  
249 long-interval. This is despite evidence of significantly higher antibody, B cell and T cell  
250 responses in recipients of long-interval compared to short-interval vaccination

251 regimens,<sup>15,23,24</sup> and higher VE against symptomatic infection from one observational study.<sup>15</sup>

252 Plausibly the threshold to prevent all infections may be lower than that for symptomatic

253 infection.

254 Studies to date have shown more durable protection against severe outcomes of

255 hospitalisation and death following vaccination.<sup>7,25</sup> Whilst we have estimated VE against all

256 infections, including asymptomatic infections that have limited clinical impact, a reduction in

257 VE against infection will increase transmission and risk of infection to high- risk individuals,

258 some of whom will progress to severe disease.

259 To our knowledge, this study reports the longest real-world follow-up time from primary

260 infection to date. It remains unclear how long immune protection will last after previous

261 infection due to the limited length of follow-up period, however modelling has suggested that

262 protection could last for up to 61 months.<sup>21,26</sup> In our cohort, we have demonstrated that

263 protection from primary infection can last up to 15 months in some individuals, while other

264 studies have reported protection ranging from 5-12 months.<sup>27-29</sup> Our ability to study infection-

265 acquired immunity in unvaccinated individuals at longer intervals is now limited given the

266 very small number of our cohort remaining unvaccinated. It is important to highlight that

267 most follow-up without vaccination in the 9-15-month category occurred in the pre-Delta

268 wave. It is possible that the sustained infection-acquired protection in our cohort is affected

269 by repeated low dose occupational exposure to COVID-19,<sup>30</sup> and therefore less

270 generalisable to populations at lower exposure. It is also possible that this results from a

271 broader diversity of T-cell immunity against different SARS-CoV-2 spike protein epitopes

272 emerging following infection, enhancing protection against variants and inducing long-lasting

273 memory T-cell populations.<sup>27,31,32</sup> Although our finding of greater protection following

274 infection-acquired immunity has been demonstrated by other authors,<sup>33,34</sup> others have

275 reported vaccine-acquired immunity to be equivalent,<sup>35,36</sup> or superior.<sup>37</sup> Despite the high

276 protection provided by infection-acquired immunity, we have demonstrated additional benefit

277 from vaccination in previously infected participants, in line with previous studies.<sup>34,38,39</sup> Until

278 thresholds for protective antibody titres against SARS-CoV-2 infection are established, it is  
279 challenging to accurately estimate how much vaccine-induced immunity is required to  
280 prevent reinfection at an individual level.

281 Key strengths of our study are the size of our cohort, asymptomatic testing and testing  
282 frequency, with an average PCR test interval of 16.6 days in unvaccinated time and 14.5  
283 days per test in vaccinated follow-up time, supplemented by the widespread use of lateral  
284 flow testing, which means we can be confident that most infections were detected. As a  
285 well-defined cohort, we can simultaneously investigate vaccination and prior infection status  
286 and adjust for important confounders, including workplace exposures. The most important  
287 limitation of our study is the relatively small number of participants continuing to contribute  
288 follow-up time to key vaccination exposures: unvaccinated, ChAdOx1 and BNT162b2 short  
289 interval. This particularly affects the precision of estimates and our ability to assess potential  
290 waning following two-doses of ChAdOx1, and >15 months after primary infection in  
291 unvaccinated participants. We consider that the strengths of our study design and speed of  
292 vaccine deployment significantly limit the impact of depletion-of-susceptible bias (which  
293 particularly affects studies on vaccine-waning),<sup>19</sup> however we recognise some residual  
294 confounding may remain.

## 295 **Conclusion**

296 Two doses of BNT162b2 vaccination, given with a short or long-interval, induce high  
297 protection to SARS-CoV-2 infection (asymptomatic and symptomatic) in the short-term, but  
298 this protection wanes after six months, during a period where Delta predominates.  
299 Protection provided from two doses of ChAdOX1 is considerably lower overall. The highest  
300 and most durable protection is observed in those with hybrid immunity, who received one or  
301 two doses of vaccine after a primary infection; this will be important for the deployment of  
302 vaccines in highly exposed and immune populations. Strategic use of booster vaccine  
303 doses to avert waning of protection (particularly in double vaccinated naïve individuals) is

304 essential to provide reduced infection, and therefore transmission in the ongoing global  
305 response to COVID-19.

306 **Acknowledgements**

307 We would like to thank all participants for their ongoing contribution and commitment to this  
308 study, and to all the research teams for their hard-work and support delivering the study at  
309 all 135 sites. Thank you all for making SIREN possible.

310

311 We are grateful to colleagues at the UKHSA Seroepidemiology Unit for their support  
312 biobanking and processing the high-volumes of serum samples and to colleagues at UKHSA  
313 Porton Down who have organised and performed all the centralised serology testing,  
314 including testing 35,000 baseline samples, in particular Caoimhe Kelly, Anaya Ellis, Gabrielle  
315 Harker, Olivia Carr, Aaron Lloyd, Hannah Selman, Matthew Royds and Georgia Hemingway.

316

317

318 **References**

- 319 1. Our World in Data. Coronavirus (COVID-19) Deaths - Statistics and Research. 2021. (Accessed  
320 24/11/2021, 2021, at <https://ourworldindata.org/covid-deaths>.)
- 321 2. Department of Health. Chapter 14a COVID-19 - SARS-CoV-2. 2021. The Green Book.  
322 (Accessed 02/11/2021, 2021, at  
323 [https://assets.publishing.service.gov.uk/government/uploads/system/uploads/attachment\\_data/file](https://assets.publishing.service.gov.uk/government/uploads/system/uploads/attachment_data/file/984310/Greenbook_chapter_14a_7May2021.pdf)  
324 [/984310/Greenbook\\_chapter\\_14a\\_7May2021.pdf](https://assets.publishing.service.gov.uk/government/uploads/system/uploads/attachment_data/file/984310/Greenbook_chapter_14a_7May2021.pdf) )
- 325 3. Department of Health. Optimising the COVID-19 vaccination programme for maximum  
326 short-term impact. GOV.UK, 2021. (Accessed 02/11/2021, 2021, at  
327 [https://www.gov.uk/government/publications/prioritising-the-first-covid-19-vaccine-dose-jcvi-](https://www.gov.uk/government/publications/prioritising-the-first-covid-19-vaccine-dose-jcvi-statement/optimising-the-covid-19-vaccination-programme-for-maximum-short-term-impact)  
328 [statement/optimising-the-covid-19-vaccination-programme-for-maximum-short-term-impact](https://www.gov.uk/government/publications/prioritising-the-first-covid-19-vaccine-dose-jcvi-statement/optimising-the-covid-19-vaccination-programme-for-maximum-short-term-impact).)
- 329 4. Lopez Bernal J, Andrews N, Gower C, et al. Effectiveness of the Pfizer-BioNTech and Oxford-  
330 AstraZeneca vaccines on covid-19 related symptoms, hospital admissions, and mortality in older  
331 adults in England: test negative case-control study. *BMJ* 2021;373:n1088-n.
- 332 5. Hall VJ, Foulkes S, Saei A, et al. COVID-19 vaccine coverage in health-care workers in England  
333 and effectiveness of BNT162b2 mRNA vaccine against infection (SIREN): a prospective, multicentre,  
334 cohort study. *Lancet* 2021;397:1725-35.
- 335 6. UK Health Security Agency. Coronavirus (COVID-19) in the UK. 2021. (Accessed 01/11/2021,  
336 2021, at <https://coronavirus.data.gov.uk/details/vaccinations>.)
- 337 7. Andrews N, Tessier E, Stowe J, et al. Vaccine effectiveness and duration of protection of  
338 Comirnaty, Vaxzevria and Spikevax against mild and severe COVID-19 in the UK. *medRxiv*  
339 2021:2021.09.15.21263583.
- 340 8. Tartof SY, Slezak JM, Fischer H, et al. Effectiveness of mRNA BNT162b2 COVID-19 vaccine up  
341 to 6 months in a large integrated health system in the USA: a retrospective cohort study. *The Lancet*  
342 2021;398:1407-16.

- 343 9. Chemaitelly H, Tang P, Hasan MR, et al. Waning of BNT162b2 Vaccine Protection against  
344 SARS-CoV-2 Infection in Qatar. *New England Journal of Medicine* 2021.
- 345 10. Levin EG, Lustig Y, Cohen C, et al. Waning Immune Humoral Response to BNT162b2 Covid-19  
346 Vaccine over 6 Months. *New England Journal of Medicine* 2021.
- 347 11. Goldberg Y, Mandel M, Bar-On YM, et al. Waning Immunity after the BNT162b2 Vaccine in  
348 Israel. *New England Journal of Medicine* 2021.
- 349 12. Department of Health. COVID-19 vaccination: a guide to booster vaccination. 2021.  
350 (Accessed 02/11/2021, 2021, at [https://www.gov.uk/government/publications/covid-19-](https://www.gov.uk/government/publications/covid-19-vaccination-booster-dose-resources/covid-19-vaccination-a-guide-to-booster-vaccination)  
351 [vaccination-booster-dose-resources/covid-19-vaccination-a-guide-to-booster-vaccination.](https://www.gov.uk/government/publications/covid-19-vaccination-a-guide-to-booster-vaccination))
- 352 13. Wallace S, Hall V, Charlett A, et al. SIREN protocol: Impact of detectable anti-SARS-CoV-2 on  
353 the subsequent incidence of COVID-19 in 100,000 healthcare workers: do antibody positive  
354 healthcare workers have less reinfection than antibody negative healthcare workers? medRxiv  
355 2020:2020.12.15.20247981.
- 356 14. Hall VJ, Foulkes S, Charlett A, et al. SARS-CoV-2 infection rates of antibody-positive  
357 compared with antibody-negative health-care workers in England: a large, multicentre, prospective  
358 cohort study (SIREN). *The Lancet* 2021;397:1459-69.
- 359 15. Amirthalingam G, Bernal JL, Andrews NJ, et al. Higher serological responses and increased  
360 vaccine effectiveness demonstrate the value of extended vaccine schedules in combatting COVID-19  
361 in England. medRxiv 2021:2021.07.26.21261140.
- 362 16. von Elm E, Altman DG, Egger M, Pocock SJ, Gøtzsche PC, Vandenbroucke JP. The  
363 Strengthening the Reporting of Observational Studies in Epidemiology (STROBE) statement:  
364 guidelines for reporting observational studies. *The Lancet* 2007;370:1453-7.
- 365 17. Lopez Bernal J, Andrews N, Gower C, et al. Effectiveness of Covid-19 Vaccines against the  
366 B.1.617.2 (Delta) Variant. *N Engl J Med* 2021;385:585-94.



- 367 18. Andrews N, Stowe J, Kirsebom F, Gower C, Ramsay M, Bernal JL. Effectiveness of BNT162b2  
368 (Comirnaty, Pfizer-BioNTech) COVID-19 booster vaccine against covid-19 related symptoms in  
369 England: test negative case-control study. medRxiv 2021:2021.11.15.21266341.
- 370 19. Lipsitch M, Goldstein E, Ray GT, Fireman B. Depletion-of-susceptibles bias in influenza  
371 vaccine waning studies: how to ensure robust results. *Epidemiol Infect* 2019;147:e306-e.
- 372 20. Aldridge RW, Yavlinsky A, Nguyen V, et al. Waning of SARS-CoV-2 antibodies targeting the  
373 Spike protein in individuals post second dose of ChAdOx1 and BNT162b2 COVID-19 vaccines and risk  
374 of breakthrough infections: analysis of the Virus Watch community cohort. medRxiv  
375 2021:2021.11.05.21265968.
- 376 21. Wei J, Pouwels KB, Stoesser N, et al. SARS-CoV-2 anti-spike IgG antibody responses after  
377 second dose of ChAdOx1 or BNT162b2 and correlates of protection in the UK general population.  
378 medRxiv 2021:2021.09.13.21263487.
- 379 22. Parry H, Bruton R, Stephens C, et al. Differential immunogenicity of BNT162b2 or ChAdOx1  
380 vaccines after extended-interval homologous dual vaccination in older people. *Immun Ageing*  
381 2021;18:34.
- 382 23. Payne RP, Longet S, Austin JA, et al. Immunogenicity of standard and extended dosing  
383 intervals of BNT162b2 mRNA vaccine. *Cell* 2021;184:5699-714.e11.
- 384 24. Parry H, Bruton R, Stephens C, et al. Extended interval BNT162b2 vaccination enhances peak  
385 antibody generation in older people. medRxiv 2021:2021.05.15.21257017.
- 386 25. Tenforde MW, Self WH, Naioti EA, et al. Sustained Effectiveness of Pfizer-BioNTech and  
387 Moderna Vaccines Against COVID-19 Associated Hospitalizations Among Adults - United States,  
388 March-July 2021. *MMWR Morb Mortal Wkly Rep* 2021;70:1156-62.
- 389 26. Townsend JP, Hassler HB, Wang Z, et al. The durability of immunity against reinfection by  
390 SARS-CoV-2: a comparative evolutionary study. *The Lancet Microbe* 2021.
- 391 27. Milne G, Hames T, Scotton C, et al. Does infection with or vaccination against SARS-CoV-2  
392 lead to lasting immunity? *The Lancet Respiratory Medicine*.

- 393 28. Wang Z, Muecksch F, Schaefer-Babajew D, et al. Naturally enhanced neutralizing breadth  
394 against SARS-CoV-2 one year after infection. *Nature* 2021;595:426-31.
- 395 29. Hansen CH, Michlmayr D, Gubbels SM, Mølbak K, Ethelberg S. Assessment of protection  
396 against reinfection with SARS-CoV-2 among 4 million PCR-tested individuals in Denmark in 2020: a  
397 population-level observational study. *The Lancet* 2021;397:1204-12.
- 398 30. Swadling L, Diniz MO, Schmidt NM, et al. Pre-existing polymerase-specific T cells expand in  
399 abortive seronegative SARS-CoV-2. *Nature* 2021.
- 400 31. Kojima N, Klausner JD. Protective immunity after recovery from SARS-CoV-2 infection. *The*  
401 *Lancet Infectious Diseases*.
- 402 32. Jagannathan P, Wang TT. Immunity after SARS-CoV-2 infections. *Nature Immunology*  
403 2021;22:539-40.
- 404 33. Satwik R, Satwik A, Katoch S, Saluja S. ChAdOx1 nCoV-19 effectiveness during an  
405 unprecedented surge in SARS COV-2 infections. *European Journal of Internal Medicine* 2021;93:112-  
406 3.
- 407 34. Gazit S, Shlezinger R, Perez G, et al. Comparing SARS-CoV-2 natural immunity to vaccine-  
408 induced immunity: reinfections versus breakthrough infections. *medRxiv*  
409 2021:2021.08.24.21262415.
- 410 35. Lumley SF, Rodger G, Constantinides B, et al. An Observational Cohort Study on the  
411 Incidence of Severe Acute Respiratory Syndrome Coronavirus 2 (SARS-CoV-2) Infection and B.1.1.7  
412 Variant Infection in Healthcare Workers by Antibody and Vaccination Status. *Clinical Infectious*  
413 *Diseases* 2021.
- 414 36. Shenai MB, Rahme R, Noorchashm H. Equivalency of Protection from Natural Immunity in  
415 COVID-19 Recovered Versus Fully Vaccinated Persons: A Systematic Review and Pooled Analysis.  
416 *medRxiv* 2021:2021.09.12.21263461.
- 417 37. Catherine H. Bozio, Shaun J. Grannis, Allison L. Naleway, et al. Laboratory-Confirmed COVID-  
418 19 Among Adults Hospitalized with COVID-19–Like Illness with Infection-Induced or mRNA Vaccine-

419 Induced SARS-CoV-2 Immunity — Nine States, January–September 2021. MMWR Morbidity and  
420 Mortality Weekly Report, 2021;70:1539–44.

421 38. Cavanaugh AM, Spicer KB, Thoroughman D, Glick C, Winter K. Reduced Risk of Reinfection  
422 with SARS-CoV-2 After COVID-19 Vaccination - Kentucky, May-June 2021. MMWR Morb Mortal Wkly  
423 Rep 2021;70:1081-3.

424 39. Murugesan M, Prasad M, Hema P, Karthik R, Mammen J, Rupali P. Protective Effect  
425 Conferred by Prior Infection and Vaccination on COVID-19 in a Healthcare Worker Cohort in South  
426 India. Available at SSRN 2021.

427

428

429

430

431 **Tables and Figures**

432 **Table 1: Description of participant demographics, by cohort assignment, June 2020 to**  
 433 **September 2021**

| Demographics                                | Total n (%)  | Naïve cohort n (%) | Positive cohort n (%) | p-value |
|---------------------------------------------|--------------|--------------------|-----------------------|---------|
| <b>Gender</b>                               |              |                    |                       |         |
| Male                                        | 5699 (15.9)  | 4051 (15.4)        | 1648 (17.4)           | <0.0001 |
| Female                                      | 30017 (83.9) | 22190 (84.4)       | 7827 (82.5)           | <0.0001 |
| Other                                       | 52 (0.1)     | 39 (0.1)           | 13 (0.1)              | -       |
| <b>Age group</b>                            |              |                    |                       |         |
| Under 25                                    | 1297 (3.6)   | 935 (3.6)          | 362 (3.8)             | 0.3734  |
| 25 to 34                                    | 7106 (19.9)  | 5023 (19.1)        | 2083 (22.0)           | <0.0001 |
| 35 to 44                                    | 8848 (24.7)  | 6580 (25.0)        | 2268 (23.9)           | 0.0332  |
| 45 to 54                                    | 10874 (30.4) | 8007 (30.5)        | 2867 (30.2)           | 0.5861  |
| 55 to 64                                    | 7085 (19.8)  | 5283 (20.1)        | 1802 (19.0)           | 0.0212  |
| Over 65                                     | 558 (1.6)    | 452 (1.7)          | 106 (1.1)             | <0.0001 |
| <b>Ethnicity</b>                            |              |                    |                       |         |
| White                                       | 31634 (88.4) | 23610 (89.8)       | 8024 (84.6)           | <0.0001 |
| Asian                                       | 2486 (7.0)   | 1581 (6.0)         | 905 (9.5)             | <0.0001 |
| Black                                       | 621 (1.7)    | 381 (1.4)          | 240 (2.5)             | <0.0001 |
| Mixed race                                  | 535 (1.5)    | 380 (1.4)          | 155 (1.6)             | 0.1629  |
| Other ethnic group                          | 427 (1.2)    | 278 (1.1)          | 149 (1.6)             | 0.0002  |
| Prefer not to say                           | 65 (0.2)     | 50 (0.2)           | 15 (0.2)              | -       |
| <b>Medical conditions category</b>          |              |                    |                       |         |
| No medical condition                        | 26670 (74.6) | 19569 (74.5)       | 7101 (74.8)           | 0.5651  |
| Immunosuppression                           | 803 (2.2)    | 623 (2.4)          | 180 (1.9)             | 0.005   |
| Chronic respiratory conditions              | 4439 (12.4)  | 3306 (12.6)        | 1133 (11.9)           | 0.0763  |
| Chronic non-respiratory conditions          | 3856 (10.8)  | 2782 (10.6)        | 1074 (11.3)           | 0.0596  |
| <b>Staff group</b>                          |              |                    |                       |         |
| Administrative/Executive (office based)     | 5434 (15.2)  | 4280 (16.3)        | 1154 (12.2)           | <0.0001 |
| Nursing                                     | 12184 (34.1) | 8658 (32.9)        | 3526 (37.2)           | <0.0001 |
| Healthcare Assistant                        | 2901 (8.1)   | 1994 (7.6)         | 907 (9.6)             | <0.0001 |
| Doctor                                      | 4248 (11.9)  | 3053 (11.6)        | 1195 (12.6)           | 0.0098  |
| Midwife                                     | 777 (2.2)    | 582 (2.2)          | 195 (2.1)             | 0.5669  |
| Physiotherapist/Occupational Therapist/SALT | 1438 (4.0)   | 996 (3.8)          | 442 (4.7)             | 0.0001  |
| Estates/Porters/Security                    | 530 (1.5)    | 389 (1.5)          | 141 (1.5)             | -       |
| Pharmacist                                  | 737 (2.1)    | 582 (2.2)          | 155 (1.6)             | 0.0004  |
| Healthcare Scientist                        | 1390 (3.9)   | 1147 (4.4)         | 243 (2.6)             | <0.0001 |
| Student (Medical/Nursing/Midwifery/Other)   | 1200 (3.4)   | 867 (3.3)          | 333 (3.5)             | 0.3536  |
| Other                                       | 4929 (13.8)  | 3732 (14.2)        | 1197 (12.6)           | 0.0001  |
| <b>Occupational setting</b>                 |              |                    |                       |         |
| Office based                                | 7002 (19.6)  | 5481 (20.9)        | 1521 (16.0)           | <0.0001 |
| Patient facing (non-clinical)               | 1378 (3.9)   | 1064 (4.0)         | 314 (3.3)             | 0.0023  |
| Outpatient                                  | 7341 (20.5)  | 5662 (21.5)        | 1679 (17.7)           | <0.0001 |

|                                                |               |                      |                     |         |
|------------------------------------------------|---------------|----------------------|---------------------|---------|
| Maternity/Labour Ward                          | 477 (1.3)     | 361 (1.4)            | 116 (1.2)           | 0.1475  |
| Ambulance/Emergency Department/Inpatient Wards | 6456 (18.0)   | 4225 (16.1)          | 2231 (23.5)         | <0.0001 |
| Intensive Care                                 | 1669 (4.7)    | 1273 (4.8)           | 396 (4.2)           | 0.0173  |
| Theatres                                       | 866 (2.4)     | 657 (2.5)            | 209 (2.2)           | 0.1031  |
| Other                                          | 10579 (29.6)  | 7557 (28.8)          | 3022 (31.9)         | <0.0001 |
| <b>Patient contact</b>                         |               |                      |                     |         |
| No                                             | 5105 (14.3)   | 4053 (15.4)          | 1052 (11.1)         | <0.0001 |
| Yes                                            | 30663 (85.7)  | 22227 (84.6)         | 8436 (88.9)         | <0.0001 |
| <b>Frequency of COVID-19 patient contact</b>   |               |                      |                     |         |
| Never                                          | 12752 (35.7)  | 10290 (39.2)         | 2462 (25.9)         | <0.0001 |
| Every day                                      | 8797 (24.6)   | 5585 (21.3)          | 3212 (33.9)         | <0.0001 |
| Once week                                      | 6229 (17.4)   | 4340 (16.5)          | 1889 (19.9)         | <0.0001 |
| Once month                                     | 3257 (9.1)    | 2368 (9.0)           | 889 (9.4)           | 0.2457  |
| Less month                                     | 4733 (13.2)   | 3697 (14.1)          | 1036 (10.9)         | <0.0001 |
| <b>Index of Multiple Deprivation</b>           |               |                      |                     |         |
| 5 (least deprived)                             | 8871 (24.8)   | 6563 (25.0)          | 2308 (24.3)         | 0.176   |
| 4                                              | 8073 (22.6)   | 5982 (22.8)          | 2091 (22.0)         | 0.1102  |
| 3                                              | 7515 (21.0)   | 5537 (21.1)          | 1978 (20.8)         | 0.5387  |
| 2                                              | 6020 (16.8)   | 4408 (16.8)          | 1612 (17.0)         | 0.6555  |
| 1 (most deprived)                              | 3858 (10.8)   | 2680 (10.2)          | 1178 (12.4)         | <0.0001 |
| Not known                                      | 1431 (4.0)    | 1110 (4.2)           | 321 (3.4)           | 0.0006  |
| <b>Geographical area</b>                       |               |                      |                     |         |
| East Midlands                                  | 2825 (7.9)    | 1963 (7.5)           | 862 (9.1)           | <0.0001 |
| East of England                                | 3363 (9.4)    | 2415 (9.2)           | 948 (10.0)          | 0.0222  |
| London                                         | 3688 (10.3)   | 2432 (9.3)           | 1256 (13.2)         | <0.0001 |
| North East                                     | 647 (1.8)     | 453 (1.7)            | 194 (2.0)           | 0.0582  |
| North West                                     | 3429 (9.6)    | 2174 (8.3)           | 1255 (13.2)         | <0.0001 |
| South East                                     | 3548 (9.9)    | 2568 (9.8)           | 980 (10.3)          | 0.1628  |
| South West                                     | 5540 (15.5)   | 4503 (17.1)          | 1037 (10.9)         | <0.0001 |
| West Midlands                                  | 2717 (7.6)    | 1900 (7.2)           | 817 (8.6)           | <0.0001 |
| Yorkshire and Humber                           | 2644 (7.4)    | 1765 (6.7)           | 879 (9.3)           | <0.0001 |
| Scotland                                       | 5449 (15.2)   | 4646 (17.7)          | 803 (8.5)           | <0.0001 |
| Northern Ireland                               | 1127 (3.2)    | 888 (3.4)            | 239 (2.5)           | <0.0001 |
| Wales                                          | 791 (2.2)     | 573 (2.2)            | 218 (2.3)           | 0.5715  |
| <b>Vaccination status by 21 Sep 21</b>         |               |                      |                     |         |
| 2-doses BNT162b2 Long interval                 | 28078 (78.5)  | 21427 (79.2)         | 6651 (76.4)         | <0.0001 |
| 2-doses BNT162b2 Short interval                | 3059 (8.6)    | 2493 (9.2)           | 566 (6.5)           | <0.0001 |
| 2-doses ChAdOX1                                | 2803 (7.8)    | 2002 (7.4)           | 801 (9.2)           | <0.0001 |
| 1-dose (any)                                   | 937 (2.6)     | 652 (2.4)            | 285 (3.3)           | <0.0001 |
| Unvaccinated                                   | 891 (2.5)     | 483 (1.8)            | 408 (4.7)           | <0.0001 |
| <b>Total</b>                                   | <b>35,768</b> | <b>26,280 (73.5)</b> | <b>9,488 (26.5)</b> |         |

434 Positive cohort assignment: 83% seropositive (72% on UKHSA testing), 17% seronegative with historic antibody/PCR positive).  
 435 Primary infections in the positive cohort occurred in March-May 2020 for 2,576 (57.6%) participants, June-August for 167  
 436 (3.7%) and September-December for 1,728 (38.6%). \* Index of Multiple Deprivation (IMD), which is a measure of  
 437 neighbourhood relative deprivation calculated by the Office of National Statistics, was obtained through linkage with participant  
 438 postcodes

439

440 **Table 2: Incidence of SARS-CoV-2 infections and effectiveness of COVID-19 vaccines**  
 441 **against infection by dose, manufacturer and dosing interval, SIREN participants 07**  
 442 **December 2020 to 21 September 2021**

| Vaccine status                 | Number of participants | Number of days of follow up | All infections (symptomatic & asymptomatic) |                                  |                   |                   |
|--------------------------------|------------------------|-----------------------------|---------------------------------------------|----------------------------------|-------------------|-------------------|
|                                |                        |                             | Number of infections                        | Crude Incident rate (per 10,000) | VE (1-HR) 95% CI  | aVE (1-HR) 95% CI |
| <b>Unvaccinated</b>            | 24,787                 | 995,122                     | 1067                                        | 10.72                            | Reference         | Reference         |
| <b>Vaccinated 1 dose</b>       |                        |                             |                                             |                                  |                   |                   |
| Time since vaccine             |                        |                             |                                             |                                  |                   |                   |
| <i>BNT162b2</i>                |                        |                             |                                             |                                  |                   |                   |
| 21 – 27 days                   | 21,374                 | 141,696                     | 55                                          | 3.88                             | 0.56 (0.40-0.68)  | 0.57 (0.41-0.69)  |
| 28 – 41 days                   | 21,137                 | 279,672                     | 62                                          | 2.22                             | 0.62 (0.46-0.74)  | 0.62 (0.46-0.74)  |
| 42 – 55 days                   | 21,968                 | 289,896                     | 32                                          | 1.10                             | 0.68 (0.52-0.78)  | 0.67 (0.51-0.78)  |
| > 55 days                      | 23,049                 | 477,746                     | 60                                          | 1.26                             | 0.64 (0.51-0.73)  | 0.58 (0.42-0.70)  |
| <i>ChAdOX1</i>                 |                        |                             |                                             |                                  |                   |                   |
| 21 – 27 days                   | 2,299                  | 15,848                      | 3                                           | 1.89                             | 0.46 (-0.82-0.84) | 0.42 (-0.92-0.83) |
| 28 – 41 days                   | 2,423                  | 32,556                      | 1                                           | 0.31                             | 0.88 (0.17-0.98)  | 0.87 (0.10-0.98)  |
| 42 – 55 days                   | 2,488                  | 33,514                      | 3                                           | 0.90                             | 0.46 (-0.56-0.81) | 0.40 (-0.75-0.80) |
| > 55 days                      | 2,503                  | 64,708                      | 10                                          | 1.55                             | 0.36 (-0.30-0.68) | 0.29 (-0.43-0.65) |
| <b>Vaccinated 2 doses</b>      |                        |                             |                                             |                                  |                   |                   |
| Time since vaccine             |                        |                             |                                             |                                  |                   |                   |
| <i>BNT162b2 long-interval</i>  |                        |                             |                                             |                                  |                   |                   |
| 14 – 73 days                   | 25,571                 | 1,466,353                   | 26                                          | 0.18                             | 0.83 (0.70-0.90)  | 0.81 (0.68-0.89)  |
| 74 – 133 days                  | 23,776                 | 1,297,486                   | 285                                         | 2.20                             | 0.70 (0.61-0.77)  | 0.65 (0.56-0.73)  |
| 134 – 193 days                 | 18,255                 | 688,494                     | 505                                         | 7.33                             | 0.70 (0.61-0.77)  | 0.67 (0.58-0.75)  |
| >193 days                      | 2,704                  | 24,575                      | 83                                          | 33.77                            | 0.43 (0.16-0.61)  | 0.43 (0.17-0.61)  |
| <i>BNT162b2 short-interval</i> |                        |                             |                                             |                                  |                   |                   |
| 14 – 73 days                   | 2,861                  | 151,318                     | 10                                          | 0.66                             | 0.85 (0.70-0.92)  | 0.85 (0.71-0.92)  |
| 74 – 133 days                  | 2,822                  | 164,199                     | 6                                           | 0.37                             | 0.72 (0.40-0.87)  | 0.72 (0.42-0.86)  |
| 134 – 193 days                 | 2,659                  | 147,301                     | 50                                          | 3.39                             | 0.56 (0.38-0.69)  | 0.55 (0.37-0.67)  |
| >193 days                      | 2,105                  | 84,705                      | 90                                          | 10.63                            | 0.59 (0.41-0.71)  | 0.58 (0.40-0.71)  |
| <i>ChAdOX1</i>                 |                        |                             |                                             |                                  |                   |                   |
| 14 – 73 days                   | 2,394                  | 133,865                     | 19                                          | 1.42                             | 0.52 (0.20-0.71)  | 0.49 (0.16-0.69)  |
| 74 – 133 days                  | 2,003                  | 92,621                      | 55                                          | 5.94                             | 0.53 (0.34-0.67)  | 0.47 (0.26-0.63)  |
| > 133 days                     | 995                    | 23,226                      | 32                                          | 13.78                            | 0.59 (0.31-0.75)  | 0.51 (0.18-0.71)  |

443 Number of infections includes both primary infections and reinfections (all PCR confirmed)

444 Crude incident rate: number of infections/days of follow-up (\*10,000), does not adjust for variable baseline  
 445 hazard.

446 VE: unadjusted Vaccine Effectiveness, model adjusted for time since vaccination and previous infection status  
 447 (time since previous infection).

448 aVE: adjusted Vaccine Effectiveness, model adjusted for time since vaccination and previous infection status  
 449 (time since previous infection) and constant predictors: age, gender, ethnicity, comorbidities, workplace setting,  
 450 frequency of contact with COVID-19 patients, geographical area (of workplace). More details are available in  
 451 supplementary Table i



**Table 3: Incidence of SARS-CoV-2 reinfections and durability of protection against SARS-CoV-2 reinfection, adjusted for vaccine status, in the SIREN cohort between 07 December 2020 and 21 September 2021**

| Vaccine and prior infection status | Number of participants | Number of days of follow up | Number of infections | Crude incident rate (per 10,000) | Adjusted Absolute protection against infection (1-HR) 95% CI |
|------------------------------------|------------------------|-----------------------------|----------------------|----------------------------------|--------------------------------------------------------------|
| <b>Unvaccinated</b>                |                        |                             |                      |                                  |                                                              |
| Naïve                              | 18,039                 | 646,495                     | 983                  | 15.21                            | Reference                                                    |
| Prior infection 3-9 months         | 6,173                  | 169,697                     | 41                   | 2.42                             | 0.85 (0.80-0.89)                                             |
| Prior infection 9-15 months        | 4,145                  | 163,437                     | 32                   | 1.96                             | 0.85 (0.78-0.89)                                             |
| Prior infection ≥15 months         | 291                    | 15,493                      | 11                   | 7.10                             | 0.73 (0.43-0.87)                                             |
| <b>Vaccinated dose 1</b>           |                        |                             |                      |                                  |                                                              |
| Naïve                              | 21,283                 | 1,273,056                   | 607                  | 4.77                             | 0.35 (0.24-0.44)                                             |
| Prior infection 3-9 months         | 4,561                  | 152,160                     | 15                   | 0.99                             | 0.87 (0.79-0.92)                                             |
| Prior infection 9-15 months        | 5,978                  | 358,618                     | 24                   | 0.67                             | 0.90 (0.86-0.93)                                             |
| Prior infection ≥15 months         | 196                    | 7,353                       | 2                    | 2.72                             | 0.87 (0.50-0.97)                                             |
| <b>Vaccinated dose 2</b>           |                        |                             |                      |                                  |                                                              |
| Naïve                              | 22,586                 | 3,414,257                   | 1102                 | 3.23                             | 0.64 (0.56-0.70)                                             |
| Prior infection 3-9 months         | 2,928                  | 320,252                     | 24                   | 0.75                             | 0.91 (0.86-0.94)                                             |
| Prior infection 9-15 months        | 7,202                  | 624,026                     | 29                   | 0.46                             | 0.91 (0.86-0.94)                                             |
| Prior infection ≥15 months         | 4,980                  | 280,388                     | 30                   | 1.07                             | 0.95 (0.93-0.97)                                             |

Number of infections includes both primary infections and reinfections (all PCR confirmed)

Crude incident rate: number of infections/days of follow-up (\*10,000), does not adjust for variable baseline hazard.

Adjusted absolute protection against infection: model adjusted for previous infection status (time since previous infection), vaccine status (unvaccinated, dose 1 (this includes follow-up between dose 1 and dose 2), dose 2 (includes follow-up after dose 2)) and constant predictors: age, gender, ethnicity, comorbidities, workplace setting, frequency of contact with COVID-19 patients, geographical area (of workplace). Reference group is unvaccinated infection naïve. The model does not adjust for time since vaccination (as in table 2), vaccine manufacturer or vaccine dosing interval, therefore please refer to Table 2 for any vaccine effectiveness estimates.



**Figure 1: Adjusted Vaccine Effectiveness over time after two doses: BNT162b2 (Pfizer-BioNTech) short and long interval and ChAdOX1 (combined short and long interval)**

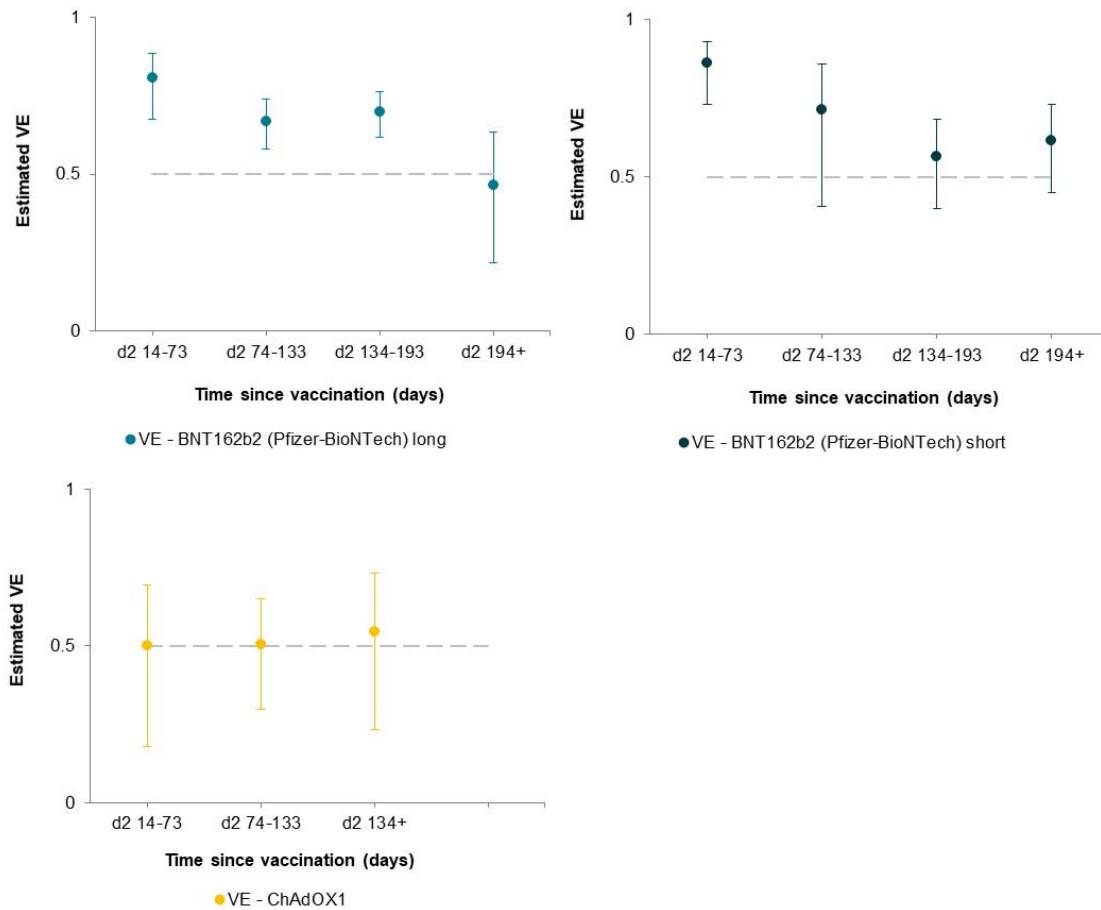

Number of participants: **BNT162b2 long-interval:** 14-73 days n=25571, 74-133 days n=23776, 134-193 days n=18255, over 193 days n=2704; **BNT162b2 short-interval:** 14-73 days n=2861, 74-133 days n=2822, 134-193 days n=2659, over 193 days n=2105; **ChAdOx1:** 14-73 days n=2394, 74-133 days n=2003, over 133 days n=995.

aVE: adjusted Vaccine Effectiveness, model adjusted for time since vaccination and previous infection status (time since previous infection) and constant predictors: age, gender, ethnicity, comorbidities, workplace setting, frequency of contact with COVID-19 patients, geographical area (of workplace).

**Figure 2: Protection following primary infection under different COVID-19 vaccination scenarios, up to 18 months following infection**

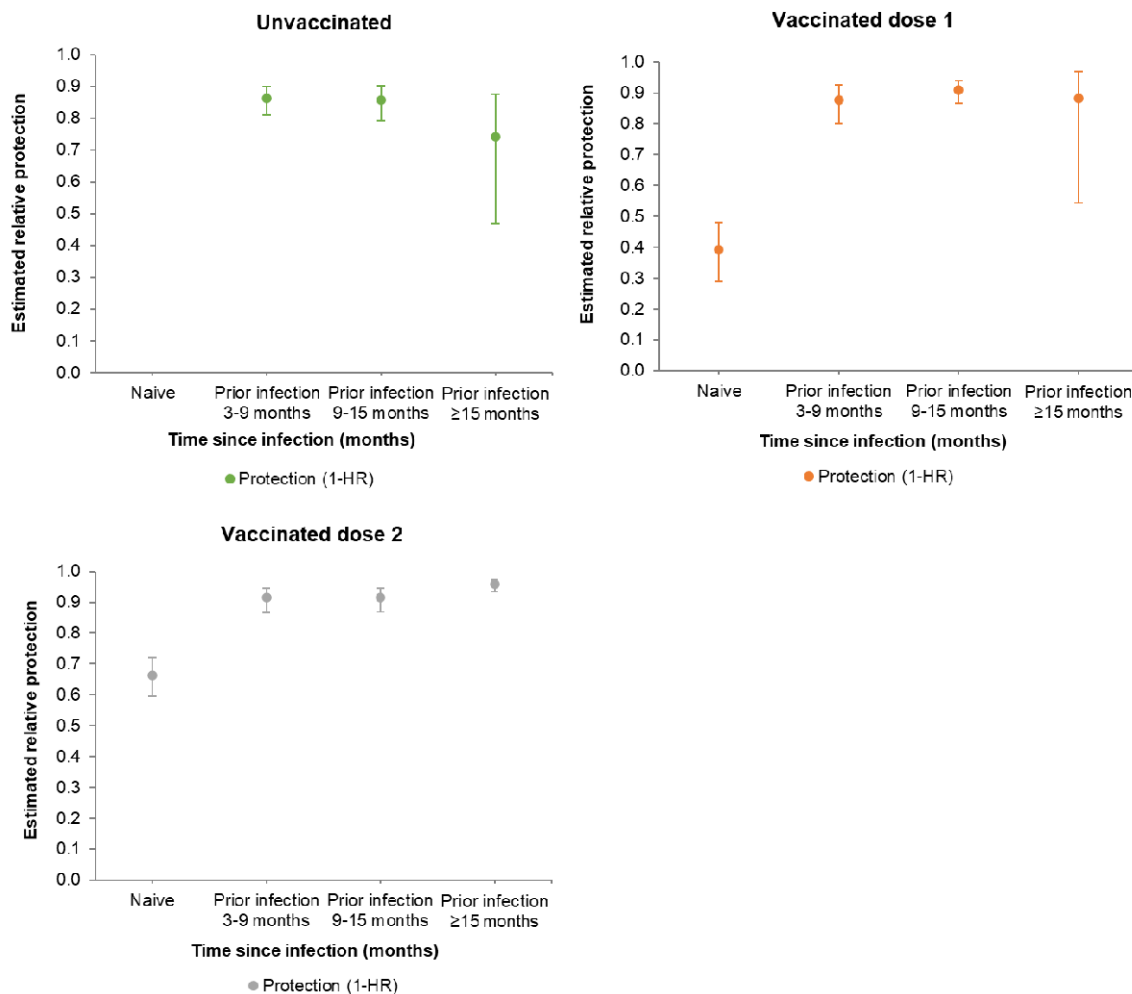

Number of participants: **Unvaccinated:** prior infection 3-9 months n=6298, 9-15 months n=4147 and over 15 months n=291; **vaccinated dose 1:** naïve n=21283, prior infection 3-9 months n=4561, 9-15 months n=5978 and over 15 months n=196; **vaccinated dose 2:** naïve n=22586, prior infection 3-9 months n=2928, 9-15 months n=7202 and over 15 months n=4980.

Adjusted absolute protection against infection: model adjusted for previous infection status (time since previous infection), vaccine status (unvaccinated, dose 1 (this includes follow-up between dose 1 and dose 2), dose 2 (includes follow-up after dose 2)) and constant predictors: age, gender, ethnicity, comorbidities, workplace setting, frequency of contact with COVID-19 patients, geographical area (of workplace). Reference group is unvaccinated infection naïve. The model does not adjust for time since vaccination (as in table 2), vaccine manufacturer or vaccine dosing interval.

□ **The SIREN study group**

| <b>No.</b> | <b>Institution</b>        | <b>First name</b> | <b>Surname</b>   |
|------------|---------------------------|-------------------|------------------|
| 1.         | UK Health Security Agency | Ana               | Atti             |
| 2.         | UK Health Security Agency | Omoyeni           | Adebiyi          |
| 3.         | UK Health Security Agency | Nick              | Andrews          |
| 4.         | UK Health Security Agency | Tim               | Brooks           |
| 5.         | UK Health Security Agency | Colin             | Brown            |
| 6.         | UK Health Security Agency | Davina            | Calbraith        |
| 7.         | UK Health Security Agency | Meera             | Chand            |
| 8.         | UK Health Security Agency | Andre             | Charlett         |
| 9.         | UK Health Security Agency | Michelle          | Cole             |
| 10.        | UK Health Security Agency | Tom               | Coleman          |
| 11.        | UK Health Security Agency | Joanna            | Conneely         |
| 12.        | UK Health Security Agency | Paul              | Conneely         |
| 13.        | UK Health Security Agency | Eleanor           | Cross            |
| 14.        | UK Health Security Agency | Silvia            | D'Arcangelo      |
| 15.        | UK Health Security Agency | Sarah             | Foulkes          |
| 16.        | UK Health Security Agency | Nabila            | Fowles-Gutierrez |
| 17.        | UK Health Security Agency | Eileen            | Gallagher        |
| 18.        | UK Health Security Agency | Natalie           | Gillson          |
| 19.        | UK Health Security Agency | Victoria          | Hall             |
| 20.        | UK Health Security Agency | Nipu              | Hettiarachchi    |
| 21.        | UK Health Security Agency | Jacqueline        | Hewson           |
| 22.        | UK Health Security Agency | Bethany           | Hicks            |
| 23.        | UK Health Security Agency | Susan             | Hopkins          |
| 24.        | UK Health Security Agency | Kate              | Howell           |
| 25.        | UK Health Security Agency | Ferdinando        | Insalata         |
| 26.        | UK Health Security Agency | Jasmin            | Islam            |
| 27.        | UK Health Security Agency | Jameel            | Khawam           |
| 28.        | UK Health Security Agency | Robert            | Kyffin           |
| 29.        | UK Health Security Agency | Ezra              | Linley           |
| 30.        | UK Health Security Agency | Iain              | Milligan         |
| 31.        | UK Health Security Agency | Sebastian         | Milward          |
| 32.        | UK Health Security Agency | Katie             | Munro            |
| 33.        | UK Health Security Agency | Claire            | Neill            |
| 34.        | UK Health Security Agency | Anne-Marie        | O'Connell        |
| 35.        | UK Health Security Agency | Ashley            | Otter            |
| 36.        | UK Health Security Agency | Mary              | Ramsay           |
| 37.        | UK Health Security Agency | Cathy             | Rowe             |
| 38.        | UK Health Security Agency | Ayoub             | Saei             |
| 39.        | UK Health Security Agency | Noshin            | Sajedi           |
| 40.        | UK Health Security Agency | Amanda            | Semper           |
| 41.        | UK Health Security Agency | Andrew            | Taylor-Kerr      |
| 42.        | UK Health Security Agency | Yrene             | Themistocleous   |
| 43.        | UK Health Security Agency | Jean              | Timeyin          |
| 44.        | UK Health Security Agency | Simon             | Tonge            |
| 45.        | UK Health Security Agency | Caio              | Tranquillini     |
| 46.        | UK Health Security Agency | Edgar             | Wellington       |
| 47.        | UK Health Security Agency | Maria             | Zambon           |

|            |                                                                 |                   |                |
|------------|-----------------------------------------------------------------|-------------------|----------------|
| 48.        | Public Health Agency Northern Ireland                           | Dianne            | Corrigan       |
| 49.        | Public Health Agency Northern Ireland                           | Lisa              | Cromey         |
| 50.        | Glasgow Caledonian University & Public Health Scotland          | Lesley            | Price          |
| 51.        | Glasgow Caledonian University & Public Health Scotland          | Sally             | Stewart        |
| 52.        | Glasgow Caledonian University & Public Health Scotland          | Nicola            | Sergenson      |
| 53.        | Public Health Scotland                                          | Jennifer          | Bishop         |
| 54.        | Public Health Scotland                                          | Jennifer          | Weir           |
| 55.        | Glasgow Caledonian University                                   | Ayo               | Matuluko       |
| 56.        | Glasgow Caledonian University                                   | Annelysse         | Jorgenson      |
| 57.        | Public Health Scotland                                          | Laura             | Dobbie         |
| 58.        | Public Health Scotland                                          | Andrew            | Telfer         |
| 59.        | Public Health Scotland                                          | David             | Goldberg       |
| 60.        | Public Health Wales                                             | Ellen             | De Lacy        |
| 61.        | Public Health Wales                                             | Guy               | Stevens        |
| 62.        | Public Health Wales                                             | Susannah          | Froude         |
| 63.        | Public Health Wales                                             | Linda             | Tyson          |
| 64.        | Health and Care Research Wales                                  | Yvette            | Ellis          |
| 65.        | Health and Care Research Wales                                  | Chris             | Norman         |
| <b>No.</b> | <b>Participating SIREN Sites</b>                                | <b>First name</b> | <b>Surname</b> |
| 1          | ALDER HEY CHILDREN'S NHS FOUNDATION TRUST                       | B                 | Larru          |
|            |                                                                 | S                 | Mcwilliam      |
| 2          | Aneurin Bevan University LHB                                    | John              | Northfield     |
|            |                                                                 | Sean              | Cutler         |
| 3          | ASHFORD AND ST PETER'S HOSPITALS NHS FOUNDATION TRUST           | Stephen           | Winchester     |
|            |                                                                 | Samuel            | Rowley         |
| 4          | BASILDON AND THURROCK UNIVERSITY HOSPITALS NHS FOUNDATION TRUST | Stacey            | Pepper         |
|            |                                                                 | Georgina          | Butt           |
| 5          | BEDFORDSHIRE HOSPITALS NHS FOUNDATION TRUST                     | Simantee          | Guha           |
|            |                                                                 | Philippa          | Bakker         |
| 6          | Belfast Health & Social Care Trust                              | Clodagh           | Loughrey       |
|            |                                                                 | A                 | Watt           |
| 7          | Betsi Cadwaladr University LHB                                  | Christian         | Subbe          |
|            |                                                                 | Alice             | Thomas         |
| 8          | BIRMINGHAM AND SOLIHULL MENTAL HEALTH NHS FOUNDATION TRUST      | Manny             | Bagary         |
|            |                                                                 | Di                | Baines         |
| 9          | BIRMINGHAM COMMUNITY HEALTHCARE NHS FOUNDATION TRUST            | Rebecca           | Chapman        |
|            |                                                                 | Lucy Booth        | Booth          |
| 10         | BLACK COUNTRY HEALTHCARE NHS FOUNDATION TRUST                   | Alison            | Grant          |
|            |                                                                 | Rebecca           | Temple-Purcell |
| 11         | BLACKPOOL TEACHING HOSPITALS NHS FOUNDATION TRUST               | Joanne            | Howard         |
|            |                                                                 | Emma              | Ward           |
| 12         | BOLTON NHS FOUNDATION TRUST                                     | Chinari           | Subudhi        |

|    |                                                                 |              |             |
|----|-----------------------------------------------------------------|--------------|-------------|
| 13 | BRIGHTON AND SUSSEX UNIVERSITY HOSPITALS NHS TRUST              | Marion       | Campbell    |
|    |                                                                 | Andrew       | Bexley      |
| 14 | BUCKINGHAMSHIRE HEALTHCARE NHS TRUST                            | R            | Penn        |
|    |                                                                 | N            | Wong        |
| 15 | CALDERDALE AND HUDDERSFIELD NHS FOUNDATION TRUST                | G            | Boyd        |
|    |                                                                 | A            | Rajgopal    |
| 16 | CENTRAL AND NORTH WEST LONDON NHS FOUNDATION TRUST              | Abigail      | Severn      |
|    |                                                                 | R            | Matthews    |
| 17 | CHESTERFIELD ROYAL HOSPITAL NHS FOUNDATION TRUST                | Edward       | Harris      |
|    |                                                                 | Amanda       | Whileman    |
| 18 | CORNWALL PARTNERSHIP NHS FOUNDATION TRUST                       | Richard      | Laugharne   |
|    |                                                                 | Joanna       | Ledger      |
| 19 | COUNTESS OF CHESTER HOSPITAL NHS FOUNDATION TRUST               | T            | Barnes      |
|    |                                                                 | C            | Jones       |
| 20 | CROYDON HEALTH SERVICES NHS TRUST                               | Banerjee     | SubhroOsuji |
|    |                                                                 | Anna         | Rokakis     |
| 21 | Cwm Taf Morgannwg University LHB                                | John         | Geen        |
|    |                                                                 | Carla        | Pothecary   |
| 22 | DARTFORD AND GRAVESHAM NHS TRUST                                | Tracy        | Edmunds     |
|    |                                                                 | Nihil        | Chitalia    |
| 23 | DERBYSHIRE COMMUNITY HEALTH SERVICES NHS FOUNDATION TRUST       | Sarah        | Creer       |
|    |                                                                 | Eve          | Etell Kirby |
| 24 | DERBYSHIRE HEALTHCARE NHS FOUNDATION TRUST                      | S            | Akhtar      |
|    |                                                                 | G            | Harrison    |
| 25 | DEVON PARTNERSHIP NHS TRUST                                     | Clare        | McAdam      |
|    |                                                                 | Natalie      | Crooks      |
| 26 | DONCASTER AND BASSETLAW TEACHING HOSPITALS NHS FOUNDATION TRUST | K            | Agwuh       |
|    |                                                                 | V            | Maxwell     |
| 27 | DORSET COUNTY HOSPITAL NHS FOUNDATION TRUST                     | Jennifer     | Graves      |
| 28 | DORSET HEALTHCARE UNIVERSITY NHS FOUNDATION TRUST               | James        | Colton      |
| 29 | EAST SUFFOLK AND NORTH ESSEX NHS FOUNDATION TRUST               | A            | O'Kelly     |
|    |                                                                 | P            | Ridley      |
| 30 | EAST SUSSEX HEALTHCARE NHS TRUST                                | Anna         | Cowley      |
|    |                                                                 | Janet        | Sinclair    |
| 31 | EPSOM AND ST HELIER UNIVERSITY HOSPITALS NHS TRUST              | Helen        | Johnstone   |
|    |                                                                 | Neringa      | Vilimiene   |
| 32 | FRIMLEY HEALTH NHS FOUNDATION TRUST                             | Manjula      | Meda        |
|    |                                                                 | Jane         | Democratis  |
| 33 | GEORGE ELIOT HOSPITAL NHS TRUST                                 | Simon        | Brake       |
|    |                                                                 | David        | Boss        |
| 34 | GLOUCESTERSHIRE HOSPITALS NHS FOUNDATION TRUST                  | Amanda       | Selassie    |
|    |                                                                 | Rekha Prince | Plackal     |

|    |                                                       |           |              |
|----|-------------------------------------------------------|-----------|--------------|
| 35 | Golden Jubilee National Hospital                      | Catherine | Sinclair     |
|    |                                                       | Val       | Irvine       |
| 36 | GREAT WESTERN HOSPITALS NHS FOUNDATION TRUST          | Eva       | Fraile       |
| 37 | HAMPSHIRE HOSPITALS NHS FOUNDATION TRUST              | Claire    | Thomas       |
|    |                                                       | Ina       | Hoad         |
| 38 | HOUNSLOW AND RICHMOND COMMUNITY HEALTHCARE NHS TRUST  | Shekoo    | Mackay       |
|    |                                                       | Shivani   | Khan         |
| 39 | HULL UNIVERSITY TEACHING HOSPITALS NHS TRUST          | Philippa  | Burns        |
|    |                                                       | Nicholas  | Easom        |
| 40 | Hywel Dda University LHB                              | Tracy     | Lewis        |
|    |                                                       | Zohra     | Omar         |
| 41 | IMPERIAL COLLEGE HEALTHCARE NHS TRUST                 | Graham    | Pickard      |
|    |                                                       | Kenisha   | Lewis        |
| 42 | ISLE OF WIGHT NHS TRUST                               | Sarah     | Hinch        |
|    |                                                       | Alison    | Brown        |
| 43 | JAMES PAGET UNIVERSITY HOSPITALS NHS FOUNDATION TRUST | Ben       | Burton       |
|    |                                                       | Christian | Hacon        |
| 44 | KING'S COLLEGE HOSPITAL NHS FOUNDATION TRUST          | Ray       | Chaudhuri    |
|    |                                                       | Jonnie    | Aeron-Thomas |
| 45 | LANCASHIRE & SOUTH CUMBRIA NHS FOUNDATION TRUST       | Robert    | Shorten      |
|    |                                                       | Kathryn   | Williams     |
| 46 | LANCASHIRE TEACHING HOSPITALS NHS FOUNDATION TRUST    | Maya      | Leach        |
|    |                                                       | Robert    | Shorten      |
| 47 | LEEDS TEACHING HOSPITALS NHS TRUST                    | Kyra      | Holliday     |
|    |                                                       | Clair     | Favager      |
| 48 | LEICESTERSHIRE PARTNERSHIP NHS TRUST                  | Sarah     | Baillon      |
|    |                                                       | Samantha  | Hamer        |
| 49 | LEWISHAM AND GREENWICH NHS TRUST                      | A         | Shah         |
|    |                                                       | J         | Russell      |
| 50 | LINCOLNSHIRE PARTNERSHIP NHS FOUNDATION TRUST         | Kelly     | Moran        |
|    |                                                       | Ananta    | Dave         |
| 51 | LIVERPOOL UNIVERSITY HOSPITALS NHS FOUNDATION TRUST   | Anu       | Chawla       |
|    |                                                       | Fran      | Westwell     |
| 52 | LONDON NORTH WEST UNIVERSITY HEALTHCARE NHS TRUST     | Ekaterina | Watson       |
|    |                                                       | D         | Adeboyeku    |
| 53 | MAIDSTONE AND TUNBRIDGE WELLS NHS TRUST               | C         | Pegg         |
|    |                                                       | M         | Williams     |
| 54 | MANCHESTER UNIVERSITY NHS FOUNDATION TRUST            | S         | Ahmad        |
|    |                                                       | A         | Horsley      |
| 55 | MID CHESHIRE HOSPITALS NHS FOUNDATION TRUST           | Claire    | Gabriel      |
|    |                                                       | Katherin  | Pagett       |
| 56 | MID ESSEX HOSPITAL SERVICES NHS TRUST                 | Lauren    | Sach         |
|    |                                                       | Yvonne    | Lester       |

|    |                                                               |            |               |
|----|---------------------------------------------------------------|------------|---------------|
| 57 | MID YORKSHIRE HOSPITALS NHS TRUST                             | Ismaelette | Del Rosario   |
|    |                                                               | John       | Ashcroft      |
| 58 | MOORFIELDS EYE HOSPITAL NHS FOUNDATION TRUST                  | Roxanne    | Crosby-Nwaobi |
|    |                                                               | Chloe      | Reeks         |
| 59 | NHS Borders                                                   | Joy        | Dawson        |
|    |                                                               | Lauren     | Finlayson     |
| 60 | NHS Fife                                                      | Susan      | Fowler        |
|    |                                                               | Devesh     | Dhasmana      |
| 61 | NHS Forth Valley                                              | Euan       | Cameron       |
|    |                                                               | Anne       | Todd          |
| 62 | NHS Grampian                                                  | Harriet    | Carroll       |
|    |                                                               | Alison     | Thornton      |
| 63 | NHS Greater Glasgow and Clyde                                 | Antonia    | Ho            |
|    |                                                               | Michael    | Murphy        |
| 64 | NHS Highland                                                  | Andrew     | Gibson        |
|    |                                                               | Alexandra  | Cochrane      |
| 65 | NHS Lanarkshire                                               | Manish     | Patel         |
|    |                                                               | Karen      | Black         |
| 66 | NHS Lothian                                                   | Kate       | Templeton     |
|    |                                                               | Andrea     | Clarke        |
| 67 | NHS Western Isles                                             | Martin     | Malcolm       |
|    |                                                               | Joan       | Frieslick     |
| 68 | NORFOLK AND NORWICH UNIVERSITY HOSPITALS NHS FOUNDATION TRUST | Ngozi      | Elumogo       |
|    |                                                               | Louise     | Coke          |
| 69 | NORTH CUMBRIA INTEGRATED CARE NHS FOUNDATION TRUST            | Beverly    | Wilkinson     |
|    |                                                               | John       | Elliott       |
| 70 | NORTH MIDDLESEX UNIVERSITY HOSPITAL NHS TRUST                 | Mariyam    | Mirfenderesky |
|    |                                                               | Pratap     | Harbham       |
| 71 | NORTH WEST ANGLIA NHS FOUNDATION TRUST                        | Janki      | Bhayani       |
|    |                                                               | Stephanie  | Diaz          |
| 72 | NORTHERN DEVON HEALTHCARE NHS TRUST                           | M          | Howard        |
|    |                                                               | T          | Lewis         |
| 73 | NORTHERN HEALTH AND SOCIAL CARE TRUST                         | Elinor     | Hanna         |
|    |                                                               | Frances    | Johnston      |
| 74 | NORTHERN LINCOLNSHIRE AND GOOLE NHS FOUNDATION TRUST          | Jonathan   | Hatton        |
|    |                                                               | Peter      | Cowling       |
| 75 | NOTTINGHAM UNIVERSITY HOSPITALS NHS TRUST                     | Sarah      | Brand         |
|    |                                                               | Imogen     | Gould         |
| 76 | POOLE HOSPITAL NHS FOUNDATION TRUST                           | Beverley   | Wadams        |
|    |                                                               | Elizabeth  | Sheridan      |
| 77 | PORTSMOUTH HOSPITALS NHS TRUST                                | Johanna    | Mouland       |
|    |                                                               | Jade       | Yates         |
| 78 | Powys Teaching LHB                                            | Jayne      | Goodwin       |
|    |                                                               | Chris      | Norman        |

|     |                                                   |                          |                  |
|-----|---------------------------------------------------|--------------------------|------------------|
| 79  | QUEEN VICTORIA HOSPITAL NHS FOUNDATION TRUST      | J                        | Giles            |
|     |                                                   | G                        | Pottinger        |
| 80  | ROYAL BERKSHIRE NHS FOUNDATION TRUST              | Maya                     | Joseph           |
|     |                                                   | Holly                    | Coles            |
| 81  | ROYAL CORNWALL HOSPITALS NHS TRUST                | H                        | Chenoweth        |
|     |                                                   | D                        | Browne           |
| 82  | ROYAL DEVON AND EXETER NHS FOUNDATION TRUST       | Cressida                 | Auckland         |
|     |                                                   | Stephanie                | Prince           |
| 83  | ROYAL FREE LONDON NHS FOUNDATION TRUST            | Alison                   | Rodger           |
|     |                                                   | Tabitha                  | Mahungu          |
| 84  | ROYAL NATIONAL ORTHOPAEDIC HOSPITAL NHS TRUST     | Esther                   | Hanison          |
|     |                                                   | Simon                    | Warren           |
| 85  | ROYAL PAPWORTH HOSPITAL NHS FOUNDATION TRUST      | Sumita                   | Pai              |
|     |                                                   | Helen                    | Baxendale        |
| 86  | ROYAL SURREY COUNTY HOSPITAL NHS FOUNDATION TRUST | Charles                  | Piercy           |
|     |                                                   | Esther                   | Tarr             |
| 87  | ROYAL UNITED HOSPITALS BATH NHS FOUNDATION TRUST  | Debbie                   | Delgado          |
|     |                                                   | Sarah                    | Meisner          |
| 88  | SALISBURY NHS FOUNDATION TRUST                    | Catherine                | Thompson         |
|     |                                                   | Sophia                   | Strong-Sheldrake |
| 89  | SANDWELL AND WEST BIRMINGHAM HOSPITALS NHS TRUST  | Ash                      | Turner           |
|     |                                                   | Anne                     | Hayes            |
| 90  | SHEFFIELD CHILDREN'S NHS FOUNDATION TRUST         | S                        | Gormley          |
|     |                                                   | C                        | Kerrison         |
| 91  | SHEFFIELD TEACHING HOSPITALS NHS FOUNDATION TRUST | Thushan                  | de Silva         |
|     |                                                   | Simon                    | Tazzyman         |
| 92  | SHERWOOD FOREST HOSPITALS NHS FOUNDATION TRUST    | Lynne                    | Allsop           |
|     |                                                   | Shrikant                 | Ambalkar         |
| 93  | SHREWSBURY AND TELFORD HOSPITAL NHS TRUST         | Mandy                    | Beekes           |
|     |                                                   | Hannah                   | Gibson           |
| 94  | SHROPSHIRE COMMUNITY HEALTH NHS TRUST             | Johanne                  | Tomlinson        |
| 95  | SOLENT NHS TRUST                                  | Cathy                    | Price            |
|     |                                                   | The Solent Research Team |                  |
| 96  | SOMERSET NHS FOUNDATION TRUST                     | Justin                   | Pepperell        |
|     |                                                   | Kate                     | James            |
| 97  | South Eastern Health & Social Care                | Yuri                     | Protaschik       |
|     | South Eastern Health & Social Care                | Tom                      | Trinick          |
| 98  | SOUTHEND UNIVERSITY HOSPITAL NHS FOUNDATION TRUST | John                     | Day              |
|     |                                                   | Swapna                   | Kunhunny         |
| 99  | Southern Health & Social Care Trust               | Angel                    | Boulos           |
|     |                                                   | Alice                    | Neave            |
| 100 | SOUTHERN HEALTH NHS FOUNDATION TRUST              | Qi                       | Zheng            |



|     |                                                                           |             |                    |
|-----|---------------------------------------------------------------------------|-------------|--------------------|
| 101 | SOUTHPORT AND ORMSKIRK HOSPITAL NHS TRUST                                 | Katherine   | Gray               |
|     |                                                                           | Kerryanne   | Brown              |
| 102 | ST GEORGE'S UNIVERSITY HOSPITALS NHS FOUNDATION TRUST                     | Tim         | Planche            |
|     |                                                                           | Angela      | Houston            |
| 103 | ST HELENS AND KNOWSLEY TEACHING HOSPITALS NHS TRUST                       | Rowan       | Pritchard Jones    |
|     |                                                                           | Diane       | Wycherley          |
| 104 | STOCKPORT NHS FOUNDATION TRUST                                            | Barzo       | Faris              |
| 105 | SURREY AND SUSSEX HEALTHCARE NHS TRUST                                    | K           | Nimako             |
|     |                                                                           | B           | Stewart            |
| 106 | Swansea Bay University LHB                                                | Claire      | Stafford           |
|     |                                                                           | Rebecca     | Thomas             |
| 107 | THE CLATTERBRIDGE CANCER CENTRE NHS FOUNDATION TRUST                      | Sheena      | Khanduri           |
|     |                                                                           | Nagesh      | Kalakonda          |
| 108 | THE DUDLEY GROUP NHS FOUNDATION TRUST                                     | Helen       | Ashby              |
| 109 | THE HILLINGDON HOSPITALS NHS FOUNDATION TRUST                             | Natasha     | Mahabir            |
| 110 | THE NEWCASTLE UPON TYNE HOSPITALS NHS FOUNDATION TRUST                    | J           | Harwood            |
|     |                                                                           | B           | Payne              |
| 111 | THE PRINCESS ALEXANDRA HOSPITAL NHS TRUST                                 | Kathryn     | Court              |
|     |                                                                           | Nikki       | White              |
| 112 | THE ROBERT JONES AND AGNES HUNT ORTHOPAEDIC HOSPITAL NHS FOUNDATION TRUST | Ruth        | Longfellow         |
| 113 | THE ROYAL BOURNEMOUTH AND CHRISTCHURCH HOSPITALS NHS FOUNDATION TRUST     | Mihye       | Lee                |
| 114 | THE ROYAL WOLVERHAMPTON NHS TRUST                                         | Marie       | Green              |
|     |                                                                           | Lauren      | Hughes             |
| 115 | TORBAY AND SOUTH DEVON NHS FOUNDATION TRUST                               | Mathew      | Halkes             |
|     |                                                                           | Pauline     | Mercer             |
| 116 | UNITED LINCOLNSHIRE HOSPITALS NHS TRUST                                   | Alun        | Roebuck            |
|     |                                                                           |             | ULHT Research Team |
| 117 | UNIVERSITY HOSPITAL SOUTHAMPTON NHS FOUNDATION TRUST                      | E           | Wilson-Davies      |
| 118 | UNIVERSITY HOSPITALS BRISTOL AND WESTON NHS FOUNDATION TRUST              | Rajeka      | Lazarus            |
|     |                                                                           | Aaran       | Sinclair           |
| 119 | UNIVERSITY HOSPITALS COVENTRY AND WARWICKSHIRE NHS TRUST                  | N           | Aldridge           |
|     |                                                                           | L           | Berry              |
| 120 | UNIVERSITY HOSPITALS OF DERBY AND BURTON NHS FOUNDATION TRUST             | F           | Game               |
|     |                                                                           | T           | Reynolds           |
| 121 | UNIVERSITY HOSPITALS OF LEICESTER NHS TRUST                               | Christopher | Holmes             |
|     |                                                                           | Martin      | Wiselka            |
| 122 | UNIVERSITY HOSPITALS OF MORECAMBE BAY NHS FOUNDATION TRUST                | Lynda       | Fothergill         |
|     |                                                                           | Karen       | Burns              |

|            |                                                                        |                   |                |
|------------|------------------------------------------------------------------------|-------------------|----------------|
| 123        | UNIVERSITY HOSPITALS OF NORTH MIDLANDS NHS TRUST                       | Christopher       | Duff           |
|            |                                                                        | Martin            | Booth          |
| 124        | UNIVERSITY HOSPITALS PLYMOUTH NHS TRUST                                | Hannah            | Jory           |
|            |                                                                        | David             | Hilton         |
| 125        | Velindre NHS Trust                                                     | Charlotte         | Young          |
|            |                                                                        | James             | Powell         |
| 126        | WALSALL HEALTHCARE NHS TRUST                                           | Lisa              | Richardson     |
|            |                                                                        | Aiden             | Plant          |
| 127        | WARRINGTON AND HALTON TEACHING HOSPITALS NHS FOUNDATION TRUST          | Zaman             | Qazzafi        |
|            |                                                                        | Lisa              | Ditchfield     |
| 128        | WEST SUFFOLK NHS FOUNDATION TRUST                                      | A                 | Moody          |
|            |                                                                        | R                 | Tilley         |
| 129        | Western Health & Social Care Trust                                     | Tracy             | Donaghy        |
|            |                                                                        | Maurice           | O'Kane         |
| 130        | WESTERN SUSSEX HOSPITALS NHS FOUNDATION TRUST                          | R                 | Sierra         |
|            |                                                                        | K                 | Shipman        |
| 131        | WHITTINGTON HEALTH NHS TRUST                                           | Philippa          | Kemsley        |
| 132        | WIRRAL UNIVERSITY TEACHING HOSPITAL NHS FOUNDATION TRUST               | D                 | Harvey         |
|            |                                                                        | Y                 | Huang          |
| 133        | WYE VALLEY NHS TRUST                                                   | L                 | Robinson       |
| 134        | YEOVIL DISTRICT HOSPITAL NHS FOUNDATION TRUST                          | Sarah             | Board          |
|            |                                                                        | Andrew            | Broadley       |
| 135        | YORK TEACHING HOSPITAL NHS FOUNDATION TRUST                            | Claire            | Brookes        |
|            |                                                                        | Mags              | Szewczyk       |
| <b>No.</b> | <b>SIREN Associated Studies</b>                                        | <b>First name</b> | <b>Surname</b> |
| 1.         | Protective Immunity from T cells to Covid-19 in Health workers (PITCH) | Susie             | Dunachie       |
| 2.         | Protective Immunity from T cells to Covid-19 in Health workers (PITCH) | Paul              | Klenerman      |
| 3.         | Protective Immunity from T cells to Covid-19 in Health workers (PITCH) | Chris             | Duncan         |
| 4.         | Protective Immunity from T cells to Covid-19 in Health workers (PITCH) | Lance             | Turtle         |
| 5.         | Protective Immunity from T cells to Covid-19 in Health workers (PITCH) | Alex              | Richter        |
| 6.         | Protective Immunity from T cells to Covid-19 in Health workers (PITCH) | Thushan           | De Silva       |
| 7.         | Protective Immunity from T cells to Covid-19 in Health workers (PITCH) | Eleanor           | Barnes         |
| 8.         | Protective Immunity from T cells to Covid-19 in Health workers (PITCH) | Daniel            | Wootton        |
| 9.         | The Humoral Immune Correlates for COVID-19 (HICC) consortium           | Jonathan          | Heeney         |
| 10.        | The Humoral Immune Correlates for COVID-19 (HICC) consortium           | Helen             | Baxendale      |

|     |                                                              |                 |                   |
|-----|--------------------------------------------------------------|-----------------|-------------------|
| 11. | The Humoral Immune Correlates for COVID-19 (HICC) consortium | Javier          | Castillo-Olivares |
| 12. | The Francis Crick Institute                                  | Rupert          | Beale             |
| 13. | The Francis Crick Institute                                  | Edward          | Carr              |
| 14. | Genotype2Phenotype (G2P)                                     | Wendy           | Barclay           |
| 15. | Genotype2Phenotype (G2P)                                     | Massimo         | Palmarini         |
| 16. | GenOMICC                                                     | John<br>Kenneth | Baillie           |
